# Supplementary material for: The influence of water table depth on evapotranspiration in the Amazon arc of deforestation
Source: Copernicus journal article supplement (doi:10.5194/hess-23-3917-2019), 2019-09-25
Supplement: Supplementary file 1 [file hess-23-3917-2019-supplement.zip]

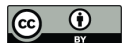

## *Supplement of*

# **The influence of water table depth on evapotranspiration in the Amazon arc of deforestation**

**John O'Connor et al.**

*Correspondence to:* John O'Connor ([j.c.oconnor@uu.nl](mailto:j.c.oconnor@uu.nl))

- [hess-23-3917-2019-supplement-title-page.pdf](#)
- [Supplemental information\\_1706.xlsx](#)

The copyright of individual parts of the supplement might differ from the CC BY 4.0 License.
