# Supplementary material for: The influence of water table depth on evapotranspiration in the Amazon arc of deforestation
Source: Copernicus journal article supplement (doi:10.5194/hess-23-3917-2019), 2019-09-25
Supplement: Supplementary file 1 [file Supplemental information_1706.xlsx]

## Sheet: 1. Mean data
Table SI.1.1 Forest summary table. Listed are mean, std, 90th quantile and 10th quantile for deep and shallow WTD at each time period annual mean, DST and WST										* Colours represent significant differences
Forest	Deep				Shallow					Green - WR, KS
	Mean	STD	90	10	Mean	STD	90	10		Blue - KS
ETdaily	3.9531	0.0808	4.0466	3.847	3.9678	0.087	4.06	3.8529		Red - 90th quantile
ETDST	4.1543	0.0591	4.2251	4.0746	4.1706	0.057	4.2367	4.0966		Yellow - 10th quantile
ETWST	3.7073	0.1021	3.8354	3.5771	3.717	0.1016	3.8384	3.5877
LSTdaily	28.5	0.315	28.9171	28.1118	28.4835	0.3071	28.9	28.1089
LSTDST	26.9369	0.2505	27.2625	26.6306	26.9693	0.2401	27.2962	26.6773
LSTWST	29.7157	0.3522	30.1785	29.2797	29.6958	0.3482	30.1661	29.2654
EVIdaily	0.4892	0.009	0.5004	0.4778	0.4912	0.0093	0.5026	0.4788
EVIDST	0.4876	0.0094	0.4993	0.4752	0.4883	0.0098	0.5004	0.4753
EVIWST	0.5008	0.0104	0.5133	0.4873	0.5053	0.0107	0.5188	0.4906
Table SI.1.2 Savanna summary table. Listed are mean, std, 90th quantile and 10th quantile for deep and shallow WTD at each time period annual mean, DST and WST
Savanna	Deep				Shallow
	Mean	STD	90	10	Mean	STD	90	10
ETdaily	2.6529	0.1337	2.8275	2.4788	2.6407	0.1375	2.8077	2.4619
ETDST	3.3308	0.1739	3.5472	3.0992	3.3345	0.1758	3.5522	3.1025
ETWST	2.8268	0.1468	3.0144	2.6351	2.8396	0.1471	3.0281	2.6564
LSTdaily	31.7054	0.3754	32.184	31.2148	31.8482	0.3703	32.3198	31.3778
LSTDST	29.374	0.3455	29.8203	28.9232	29.4829	0.3325	29.9111	29.073
LSTWST	33.1453	0.4446	33.7105	32.583	33.2351	0.4384	33.8081	32.6892
EVIdaily	0.4009	0.0119	0.4153	0.3848	0.4012	0.0121	0.4164	0.3854
EVIDST	0.4174	0.0159	0.4362	0.3961	0.4169	0.0157	0.4367	0.3957
EVIWST	0.4192	0.0143	0.4366	0.3998	0.4238	0.0141	0.4414	0.4057
Table SI.1.3 Crop summary table. Listed are mean, std, 90th quantile and 10th quantile for deep and shallow WTD at each time period annual mean, DST and WST
Crop	Deep				Shallow
	Mean	STD	90	10	Mean	STD	90	10
ETdaily	1.6975	0.0777	1.8026	1.6035	1.7129	0.0819	1.8209	1.6163
ETDST	2.1963	0.114	2.3485	2.0547	2.26	0.1219	2.4183	2.1095
ETWST	1.802	0.0965	1.9302	1.6833	1.8629	0.0977	1.9967	1.7429
LSTdaily	34.0695	0.2405	34.3652	33.7535	33.9853	0.2189	34.2569	33.7025
LSTDST	31.2562	0.2874	31.6236	30.8807	30.8637	0.3127	31.2606	30.4627
LSTWST	36.0332	0.3333	36.4592	35.5959	35.9066	0.3231	36.3098	35.4878
EVIdaily	0.3521	0.0064	0.3607	0.344	0.3565	0.0075	0.3658	0.3462
EVIDST	0.3522	0.0133	0.3699	0.3348	0.3651	0.0162	0.3863	0.3448
EVIWST	0.3636	0.0141	0.3826	0.3455	0.3776	0.0152	0.397	0.3588
																														0.3462

## Sheet: 2. ET Annual
Table SI.2.1 Forest mean daily ET, per year summary Listed are mean, std, 90th quantile and 10th quantile for deep and shallow WTD. Percentage of significant results from randomisation is given															* Colours represent significant differences
Forest ET	Deep				Shallow					Percentage significant (greater than 66%, year is considered significant)					Green - WR, KS
Daily	Mean	std	90th	10th	Mean	std	90th	10th		Wlcoxon Rank	Kolomogorov Smirnov	90th quantile	10th quantile		Blue - KS
2001	3.4365	0.0849	3.5395	3.328	3.4428	0.093	3.5505	3.326		0.1	0.15				Red - 90th quantile
2002	3.7074	0.0909	3.819	3.5909	3.7285	0.0881	3.834	3.6102		0.2	0.25				Yellow - 10th quantile
2003	4.1808	0.0803	4.2719	4.0706	4.1994	0.0786	4.2874	4.0968		0.4	0.5
2004	4.0292	0.0934	4.1354	3.9008	4.0549	0.0865	4.1565	3.9436		0.4	0.25
2005	4.0146	0.1062	4.1331	3.8701	4.0546	0.0891	4.1613	3.9438		0.6	0.5
2006	4.153	0.0955	4.2608	4.0241	4.1772	0.0789	4.2725	4.0675		0.15	0.05
2007	4.1117	0.1004	4.2292	3.9747	4.1364	0.0864	4.2392	4.02		0.2	0.25
2008	3.3835	0.088	3.4847	3.2685	3.4072	0.0873	3.5048	3.2946		0.4	0.45
2009	4.243	0.0708	4.3272	4.1497	4.2628	0.0655	4.3376	4.1745		0.15	0.25
2010	4.0914	0.087	4.1932	3.9767	4.114	0.0798	4.2077	4.0062		0.35	0.25
2011	4.1553	0.1022	4.2782	4.0163	4.1776	0.0901	4.2902	4.0584		0.05	0.05
2012	3.9764	0.0861	4.081	3.8652	3.9944	0.0905	4.0922	3.8764
Table SI.2.2 Forest DST ET, per year summary Listed are mean, std, 90th quantile and 10th quantile for deep and shallow WTD. Percentage of significant results from randomisation is given
	Deep				Shallow					Percentage significant (greater than 66%, year is considered significant)
ET DST Forest	Mean	STD	90	10	Mean	STD	90	10		Wlcoxon Rank	Kolomogorov Smirnov	90th quantile	10th quantile
2002	4.0006	0.1211	4.1561	3.8447	4.0487	0.123	4.2012	3.8841		0.6	0.75
2003	4.103	0.1378	4.2769	3.9156	4.1731	0.1412	4.3447	3.9946		0.9	1
2004	4.3121	0.0798	4.4024	4.2073	4.313	0.0808	4.4097	4.2117		0.1	0.05
2005	4.1322	0.0766	4.225	4.0357	4.1308	0.0716	4.2232	4.0424		0.1	0.25
2006	4.2766	0.0913	4.3742	4.1514	4.2972	0.0764	4.3834	4.1948		0.05	0.1
2007	4.0383	0.0837	4.1329	3.9341	4.0316	0.0769	4.127	3.9318		0.2	0.15
2008	4.5626	0.0932	4.6656	4.4428	4.5665	0.0809	4.6635	4.4657		0.05	0.1
2009	4.0308	0.0666	4.1108	3.9457	4.039	0.062	4.1158	3.9625		0	0
2010	3.7404	0.0588	3.8132	3.6671	3.7484	0.0596	3.8204	3.6762		0	0.05
2011	4.3994	0.0658	4.4825	4.311	4.4117	0.0655	4.4887	4.3324		0.15	0.1
2012	4.1023	0.0654	4.1825	4.0171	4.1161	0.0627	4.1957	4.0376		0.2	0.2
Table SI.2.3 Forest WST ET, per year summary Listed are mean, std, 90th quantile and 10th quantile for deep and shallow WTD. Percentage of significant results from randomisation is given
	Deep				Shallow					Percentage significant (greater than 66%, year is considered significant)
ET WST Forest	Mean	STD	90	10	Mean	STD	90	10		Wlcoxon Rank	Kolomogorov Smirnov	90th quantile	10th quantile
2001	4.1752	0.1972	4.432	3.9202	4.2399	0.1955	4.4879	3.9915		0.45	0.4
2002	4.3558	0.1771	4.5837	4.1263	4.3751	0.1766	4.595	4.1443		0	0
2003	4.1907	0.198	4.448	3.9424	4.1725	0.1912	4.411	3.9219		0.15	0.3
2004	4.0625	0.1986	4.3181	3.8039	4.0649	0.181	4.2928	3.8314		0.05	0.15
2005	3.796	0.1839	4.0265	3.557	3.8604	0.1651	4.0632	3.6461		0.45	0.6
2006	4.5785	0.2041	4.8433	4.3215	4.5375	0.1923	4.7806	4.2867		0.35	0.2
2007	3.594	0.1795	3.8255	3.3637	3.6367	0.1631	3.8419	3.4214		0.2	0.3
2008	0.8357	0.2278	1.1333	0.5511	0.8479	0.2285	1.138	0.557		0.05	0	0.05	0
2009	3.9255	0.1789	4.1572	3.694	3.9521	0.1678	4.1609	3.7304		0.1	0.2
2010	3.8701	0.1849	4.1099	3.6336	3.8643	0.179	4.0953	3.6384		0	0.1
2011	3.847	0.1616	4.0544	3.6359	3.8598	0.1602	4.0668	3.6519		0.05	0.15
Table SI.2.4 Savanna mean daily ET, per year summary Listed are mean, std, 90th quantile and 10th quantile for deep and shallow WTD. Percentage of significant results from randomisation is given
Savanna ET	Deep				Shallow					Percentage significant (greater than 66%, year is considered significant)
Daily	Mean	std	90th	10th	Mean	std	90th	10th		Wlcoxon Rank	Kolomogorov Smirnov	90th quantile	10th quantile
2001	1.7659	0.1333	1.9376	1.5966	1.7266	0.1343	1.8963	1.5493		0.4	0.25	0.15	0.25
2002	1.8829	0.1449	2.0716	1.7058	1.8483	0.1409	2.0283	1.6697		0.25	0.15	0.9	0.85
2003	2.6815	0.1742	2.9081	2.4471	2.673	0.1738	2.8903	2.4456		0.05	0.05	0.65	0.6
2004	2.655	0.1684	2.8719	2.4315	2.6457	0.1702	2.8561	2.4257		0.1	0.1	0.65	0.75
2005	2.5534	0.1591	2.7627	2.3465	2.5539	0.157	2.7465	2.3556		0.15	0.1	0.75	0.8
2006	2.8618	0.1623	3.0694	2.6504	2.8574	0.1658	3.06	2.6562		0.05	0.05	0.7	0.9
2007	2.7753	0.1621	2.9824	2.5598	2.7609	0.1581	2.954	2.5655		0.1	0.05	0.75	0.75
2008	2.3637	0.1164	2.51	2.2151	2.3774	0.1197	2.5274	2.2245		0.1	0.1	0.05	0.1
2009	3.4093	0.1337	3.5792	3.2421	3.4065	0.1361	3.5762	3.2325		0.1	0.1	0.7	0.85
2010	2.9843	0.1283	3.1516	2.8234	2.9789	0.1326	3.1397	2.8141		0.05	0.05	0.8	0.7
2011	2.9235	0.1377	3.1033	2.7442	2.9197	0.1342	3.0862	2.7525		0.05	0.15	0.75	0.8
2012	3.02	0.1333	3.1838	2.85	3.0129	0.1342	3.1802	2.8381
Table SI.2.5 Savanna DST ET, per year summary Listed are mean, std, 90th quantile and 10th quantile for deep and shallow WTD. Percentage of significant results from randomisation is given
	Deep				Shallow					Percentage significant (greater than 66%, year is considered significant)
ET DST Savanna	Mean	STD	90	10	Mean	STD	90	10		Wlcoxon Rank	Kolomogorov Smirnov	90th quantile	10th quantile
2002	2.2743	0.2298	2.5747	1.985	2.2547	0.2216	2.5331	1.9579		0.15	0.1	0.8	0.8
2003	2.078	0.2145	2.3531	1.8134	2.0387	0.2052	2.2993	1.7707		0.1	0.3	0.85	0.75
2004	3.4277	0.2493	3.7354	3.0945	3.4385	0.2538	3.7609	3.1112		0.05	0.35	0.7	0.85
2005	3.6339	0.1983	3.8844	3.3702	3.6132	0.2028	3.8711	3.3502		0.05	0.05	0.6	0.85
2006	3.4051	0.2286	3.7066	3.1082	3.4402	0.2274	3.7173	3.1384		0.15	0.15	0.5	0.65
2007	3.4393	0.2066	3.6961	3.159	3.4395	0.2065	3.6876	3.1635		0.05	0.1	0.7	0.75
2008	3.8846	0.2379	4.1852	3.5649	3.8948	0.2354	4.1851	3.5802		0.1	0.05	0.65	0.75
2009	3.5206	0.1661	3.7324	3.3	3.5464	0.1688	3.7508	3.3238		0.1	0.15	0.65	0.6
2010	3.6547	0.1198	3.8104	3.4956	3.6793	0.1239	3.8309	3.5187		0.2	0.25	0.65	0.8
2011	3.7697	0.1513	3.9595	3.5715	3.7767	0.1557	3.9696	3.5792		0.05	0.05	0.85	0.85
2012	3.5509	0.1353	3.7241	3.374	3.5569	0.1356	3.7289	3.3776		0.1	0.1	0.7	0.85
Table SI.2.6 Savanna WST ET, per year summary Listed are mean, std, 90th quantile and 10th quantile for deep and shallow WTD. Percentage of significant results from randomisation is given
	Deep				Shallow					Percentage significant (greater than 66%, year is considered significant)
ET WST Savanna	Mean	STD	90	10	Mean	STD	90	10		Wlcoxon Rank	Kolomogorov Smirnov	90th quantile	10th quantile
2001	2.3721	0.2206	2.6561	2.0946	2.3643	0.216	2.6293	2.0907		0.05	0.1
2002	2.5513	0.2411	2.8664	2.2418	2.5485	0.2325	2.8422	2.256		0.1	0.1
2003	2.832	0.2646	3.1797	2.4968	2.8218	0.2557	3.1519	2.494		0.1	0.15
2004	2.8532	0.2516	3.1807	2.5361	2.8991	0.2506	3.2195	2.5769		0.15	0.2
2005	2.5755	0.2204	2.8701	2.2898	2.5937	0.2142	2.8768	2.3395		0.05	0.1
2006	3.855	0.2537	4.186	3.5252	3.9284	0.26	4.2449	3.596		0.2	0.1
2007	2.4717	0.2024	2.7352	2.2076	2.5	0.2013	2.7676	2.2544		0.1	0
2008	0.9491	0.2308	1.2477	0.6575	0.8999	0.2343	1.2114	0.5953		0.15	0.1	0.05	0
2009	3.6039	0.2425	3.9189	3.2917	3.6118	0.2372	3.9314	3.3143		0	0
2010	3.6908	0.1995	3.9503	3.44	3.7211	0.2043	3.9793	3.4643		0.15	0.1
2011	3.7087	0.2015	3.964	3.4455	3.717	0.1961	3.9677	3.4764		0.05	0.05
Table SI.2.7 Crop mean daily ET, per year summary Listed are mean, std, 90th quantile and 10th quantile for deep and shallow WTD. Percentage of significant results from randomisation is given
Crop ET	Deep				Shallow					Percentage significant (greater than 66%, year is considered significant)
Daily	Mean	std	90th	10th	Mean	std	90th	10th		Wlcoxon Rank	Kolomogorov Smirnov	90th quantile	10th quantile
2001	1.0945	0.0813	1.1997	0.9938	1.1013	0.0799	1.2061	1.0052		0.05	0.1	0.05	0.1
2002	1.159	0.0818	1.2651	1.059	1.1764	0.0822	1.2877	1.0766		0.4	0.45	0.1	0.05
2003	1.499	0.1104	1.6393	1.3622	1.55	0.1148	1.7105	1.4121		0.9	0.9	0.15	0.3
2004	1.4744	0.1102	1.6272	1.3406	1.4992	0.116	1.6485	1.3521		0.15	0.45	0.15	0.05
2005	1.5161	0.1054	1.6567	1.3804	1.5596	0.1106	1.703	1.4164		0.75	0.75	0.05	0.2
2006	1.7518	0.1042	1.8887	1.6197	1.738	0.1124	1.8852	1.5977		0.15	0.3	0.15	0.8
2007	1.6918	0.1004	1.8196	1.5692	1.7124	0.1048	1.8492	1.5868		0.5	0.5	0	0.25
2008	1.5722	0.0745	1.6689	1.4777	1.5939	0.0781	1.6965	1.4984		0.4	0.55	0.05	0.1
2009	2.4239	0.0884	2.5472	2.3153	2.4262	0.0925	2.5447	2.3145		0.05	0.15	0.05	0.15
2010	2.0789	0.0762	2.1809	1.9857	2.0721	0.0827	2.181	1.9747		0.1	0.15	0.1	0.4
2011	1.9932	0.0807	2.0976	1.8939	2.0104	0.0786	2.113	1.9129		0.3	0.3	0.1	0.2
2012	2.1175	0.0791	2.2223	2.0206	2.1152	0.0833	2.2253	2.0161
Table SI.2.8 Crop DST ET, per year summary Listed are mean, std, 90th quantile and 10th quantile for deep and shallow WTD. Percentage of significant results from randomisation is given
	Deep				Shallow					Percentage significant (greater than 66%, year is considered significant)
ET DST Crop	Mean	STD	90	10	Mean	STD	90	10		Wlcoxon Rank	Kolomogorov Smirnov	90th quantile	10th quantile
2002	1.0765	0.1406	1.2594	0.9002	1.1521	0.1493	1.3488	0.9646		0.95	0.95	0.2	0.6
2003	1.1294	0.1389	1.3136	0.9586	1.1923	0.1422	1.3754	1.0099		0.9	0.8	0.1	0.4
2004	1.8112	0.1781	2.0506	1.5915	1.8895	0.1874	2.1279	1.6516		0.85	0.8	0.05	0.2
2005	2.4651	0.1642	2.6786	2.2561	2.4921	0.178	2.7228	2.2581		0.15	0.2	0.05	0.35
2006	2.0378	0.1781	2.2698	1.8155	2.1477	0.1822	2.3786	1.9183		0.8	0.95	0.1	0.3
2007	2.1622	0.1594	2.3664	1.9641	2.2372	0.168	2.4566	2.0154		0.8	0.85	0.25	0.1
2008	2.4898	0.1684	2.7019	2.2771	2.6012	0.1816	2.8385	2.365		1	1	0.25	0.25
2009	2.5247	0.1326	2.6999	2.3628	2.6168	0.1397	2.792	2.4436		1	0.95	0.35	0.4
2010	2.9551	0.086	3.0672	2.8466	2.9972	0.0961	3.1237	2.8742		0.7	0.75	0.2	0.05
2011	2.7797	0.1002	2.9125	2.6562	2.7753	0.1105	2.9167	2.6369		0	0.25	0.25	0.7
2012	2.7277	0.0896	2.8452	2.6162	2.7583	0.0981	2.8853	2.6335		0.65	0.7	0.4	0.5
Table SI.2.9 Crop WST ET, per year summary Listed are mean, std, 90th quantile and 10th quantile for deep and shallow WTD. Percentage of significant results from randomisation is given
	Deep				Shallow					Percentage significant (greater than 66%, year is considered significant)
ET WST Crop	Mean	STD	90	10	Mean	STD	90	10		Wlcoxon Rank	Kolomogorov Smirnov	90th quantile	10th quantile
2001	1.2981	0.1605	1.5104	1.0952	1.3225	0.1707	1.5386	1.1234		0.1	0.2
2002	1.3855	0.1743	1.6182	1.1707	1.4293	0.1957	1.6883	1.1903		0.2	0.2
2003	1.4613	0.1886	1.7162	1.2378	1.531	0.1995	1.7933	1.2773		0.3	0.55
2004	1.6871	0.2341	2.0056	1.4059	1.822	0.248	2.1534	1.507		0.9	0.9
2005	1.3222	0.15	1.5176	1.1335	1.4211	0.1535	1.6207	1.2341		0.95	0.95
2006	2.3983	0.1899	2.644	2.1664	2.4927	0.1986	2.7578	2.2475		0.75	0.65
2007	1.369	0.1503	1.5676	1.1783	1.4124	0.152	1.6089	1.229		0.4	0.5
2008	0.9361	0.2081	1.2093	0.6726	0.96	0.2192	1.2508	0.6878		0.15	0.45	0.8	0
2009	2.5176	0.2168	2.8004	2.2452	2.5671	0.2132	2.8531	2.2907		0.25	0.2
2010	2.8445	0.1358	3.0159	2.6794	2.8684	0.1356	3.0531	2.7027		0.15	0.2
2011	2.7972	0.1574	3.0065	2.6008	2.8242	0.1752	3.0537	2.6063		0.05	0.15

## Sheet: 3. ET Figures
Figure SI.3.1. Average seasonality of forest ET. Red line - Deep WTD, Blue line - Shallow WTD. Errorbars represent standard deviation
Figure SI.3.2. Average seasonality of svanna ET. Red line - Deep WTD, Blue line - Shallow WTD. Errorbars represent standard deviation
Figure SI.3.3. Average annual seasonality of crop ET. Red line - Deep WTD, Blue line - Shallow WTD. Errorbars represent standard deviation
Figure SI.3.4. Annual daily mean of A) Forest B) Savanna C) crop ET. Blue box - Deep WTD, Red box - Shallow WTD.

## Sheet: 4. LST Annual
Table SI.4.1 Forest mean daily LST, per year summary Listed are mean, std, 90th quantile and 10th quantile for deep and shallow WTD. Percentage of significant results from randomisation is given															* Colours represent significant differences
Forest LST	Deep				Shallow					Percentage significant (greater than 66%, year is considered significant)					Green - WR, KS
Daily	Mean	std	90th	10th	Mean	std	90th	10th		Wlcoxon Rank	Kolomogorov Smirnov	90th quantile	10th quantile		Blue - KS
2001	27.9693	0.2051	28.2384	27.7094	28.024	0.2167	28.3132	27.762		0.2	0.2	0.1	0.45		Red - 90th quantile
2002	28.2198	0.2483	28.5492	27.9091	28.2736	0.2638	28.6287	27.9514		0.15	0.15	0.1	0.3		Yellow - 10th quantile
2003	28.0988	0.2911	28.4697	27.7549	28.1488	0.3	28.5517	27.7894		0.3	0.5	0	0.75
2004	28.1003	0.3492	28.5704	27.6802	28.1006	0.3418	28.5617	27.6966		0.05	0.1	0	0.4
2005	28.5435	0.378	29.0319	28.086	28.4835	0.3537	28.9498	28.0547		0.1	0.2	0.1	0.1
2006	28.3855	0.3647	28.8487	27.9343	28.3393	0.3392	28.7925	27.9291		0.05	0.1	0.1	0.25
2007	28.5034	0.3658	29.0021	28.0664	28.4696	0.3481	28.9418	28.05		0.05	0.15	0.15	0.25
2008	28.8741	0.3796	29.3817	28.4142	28.8173	0.3576	29.284	28.3725		0.1	0.3	0.15	0.3
2009	28.3848	0.3291	28.8209	27.9724	28.3885	0.3084	28.7986	28.0112		0.1	0.3	0.05	0.5
2010	29.0642	0.3854	29.5668	28.5815	29.014	0.3701	29.4959	28.5472		0.05	0.45	0.15	0.35
2011	28.9293	0.3991	29.4498	28.4273	28.8831	0.3802	29.3901	28.4176		0.05	0.35	0.15	0.5
2012	28.9264	0.3814	29.4412	28.4379	28.8593	0.3674	29.342	28.3996
Table SI.4.2 Forest DST LST, per year summary Listed are mean, std, 90th quantile and 10th quantile for deep and shallow WTD. Percentage of significant results from randomisation is given
Forest LST	Deep				Shallow					Percentage significant (greater than 66%, year is considered significant)
DST	Mean	STD	90	10	Mean	STD	90	10		Wlcoxon Rank	Kolomogorov Smirnov	90th quantile	10th quantile
2002	26.6331	0.1894	26.8754	26.3927	26.7117	0.1997	26.983	26.4665		0.5	0.55	0.15	0.45
2003	26.9925	0.2102	27.2564	26.7304	27.0915	0.2241	27.3923	26.8273		0.5	0.7	0.15	0.75
2004	26.9407	0.2457	27.2621	26.6453	26.9949	0.2628	27.354	26.6794		0.1	0.2	0.15	0.25
2005	26.7561	0.2849	27.1068	26.4205	26.8103	0.2723	27.1768	26.4905		0.3	0.35	0	0.4
2006	27.1764	0.3438	27.625	26.771	27.1549	0.3156	27.5737	26.7801		0.05	0.1	0.15	0
2007	26.2608	0.3391	26.6893	25.858	26.2512	0.3014	26.6516	25.8988		0.1	0.2	0.1	0.3
2008	27.1441	0.3083	27.5542	26.7847	27.1587	0.2875	27.5625	26.8206		0.1	0.2	0.05	0.2
2009	27.0027	0.3024	27.3915	26.6218	27.0098	0.285	27.3729	26.6524		0.15	0.2	0.05	0.25
2010	26.2974	0.2957	26.6828	25.927	26.3041	0.2764	26.6735	25.961		0.1	0.15	0.2	0.25
2011	27.7346	0.3519	28.1964	27.3078	27.7653	0.3244	28.1838	27.3609		0.25	0.45	0	0.8
2012	27.367	0.3196	27.7742	26.9678	27.4097	0.2967	27.7948	27.0366		0.3	0.55	0.15	0.6
Table SI.4.3 Forest WST LST, per year summary Listed are mean, std, 90th quantile and 10th quantile for deep and shallow WTD. Percentage of significant results from randomisation is given
Forest LST	Deep				Shallow					Percentage significant (greater than 66%, year is considered significant)
WST	Mean	STD	90	10	Mean	STD	90	10		Wlcoxon Rank	Kolomogorov Smirnov	90th quantile	10th quantile
2001	29.1648	0.3163	29.5719	28.7666	29.2153	0.3194	29.6456	28.8118		0	0.05	0	0.05
2002	29.3884	0.4038	29.9497	28.9059	29.3788	0.4146	29.9044	28.87		0.15	0.15	0.05	0
2003	29.6418	0.4222	30.2046	29.1354	29.6964	0.4027	30.2551	29.2126		0.2	0.2	0.05	0.1
2004	29.7729	0.4845	30.4064	29.2015	29.7068	0.4706	30.3347	29.1293		0.05	0.05	0.3	0.2
2005	30.1186	0.5084	30.8118	29.5154	30.023	0.4759	30.6555	29.4216		0.1	0.15	0.15	0
2006	29.868	0.4466	30.4293	29.2956	29.8226	0.4316	30.4095	29.2698		0	0.05	0.1	0.15
2007	30.0113	0.5222	30.703	29.3508	29.9326	0.5142	30.6122	29.2761		0.2	0.15	0.25	0
2008	29.597	0.4992	30.2344	28.9674	29.6523	0.4863	30.2783	29.0168		0.05	0.05	1	1
2009	29.6995	0.4165	30.2312	29.1927	29.7422	0.3997	30.2544	29.2595		0.15	0.15	0.1	0.05
2010	30.0121	0.5007	30.6745	29.3707	29.9338	0.4906	30.5521	29.3403		0.1	0.2	0.8	0.5
2011	29.5515	0.4693	30.1544	28.98	29.5135	0.4428	30.1035	28.9629		0.1	0.2	0.35	0.15
Table SI.4.4 Savanna mean daily LST, per year summary Listed are mean, std, 90th quantile and 10th quantile for deep and shallow WTD. Percentage of significant results from randomisation is given
Savanna LST	Deep				Shallow					Percentage significant (greater than 66%, year is considered significant)
Daily	Mean	std	90th	10th	Mean	std	90th	10th		Wlcoxon Rank	Kolomogorov Smirnov	90th quantile	10th quantile
2001	31.1117	0.379	31.5972	30.6189	31.337	0.3874	31.8516	30.8497		1	0.95	0.15	0.55
2002	31.573	0.4227	32.124	31.0461	31.7982	0.4263	32.3636	31.2768		0.95	0.95	0.15	0.4
2003	31.411	0.4218	31.958	30.862	31.5872	0.408	32.0984	31.0879		0.95	0.95	0.1	0.3
2004	31.4426	0.4279	31.9961	30.8929	31.5783	0.4185	32.1064	31.04		0.7	0.9	0.15	0.35
2005	31.8074	0.4039	32.3307	31.2806	31.9212	0.4025	32.4124	31.4203		0.4	0.85	0.25	0.2
2006	31.4965	0.3849	31.9842	31.0013	31.5963	0.378	32.0747	31.1105		0.35	0.5	0.05	0.2
2007	31.6675	0.4143	32.2102	31.1321	31.8051	0.4026	32.3244	31.3093		0.7	0.75	0.05	0.15
2008	32.0453	0.402	32.568	31.5406	32.1543	0.3941	32.6613	31.6638		0.45	0.6	0.05	0.2
2009	31.1441	0.3738	31.6274	30.6651	31.2671	0.3582	31.7085	30.8189		0.55	0.55	0.05	0.25
2010	32.436	0.4041	32.9453	31.9259	32.5568	0.4041	33.0688	32.046		0.55	0.75	0.05	0.1
2011	32.2915	0.4323	32.8371	31.743	32.4041	0.4246	32.9432	31.881		0.3	0.65	0.15	0.1
2012	32.0377	0.3869	32.5168	31.5625	32.1727	0.3823	32.6574	31.6818
Table SI.4.6 Savanna DST LST, per year summary Listed are mean, std, 90th quantile and 10th quantile for deep and shallow WTD. Percentage of significant results from randomisation is given
Savanna LST	Deep				Shallow					Percentage significant (greater than 66%, year is considered significant)
DST	Mean	STD	90	10	Mean	STD	90	10		Wlcoxon Rank	Kolomogorov Smirnov	90th quantile	10th quantile
2002	29.0518	0.3884	29.5696	28.5573	29.2709	0.3896	29.7822	28.7792		1	1	0.05	0.6
2003	29.7696	0.4204	30.3266	29.2562	30.0133	0.4304	30.5538	29.4843		1	1	0.1	0.65
2004	29.4279	0.4113	29.9528	28.9069	29.5377	0.3954	30.0575	29.0384		0.7	0.95	0.1	0.5
2005	29.0821	0.3846	29.593	28.5917	29.2284	0.3784	29.7108	28.7452		0.95	1	0.05	0.55
2006	29.8676	0.4243	30.418	29.3323	29.8989	0.4158	30.4177	29.3857		0.25	0.65	0.35	0.35
2007	28.682	0.3894	29.1814	28.1894	28.7568	0.3795	29.2623	28.2773		0.35	0.65	0.15	0.5
2008	29.5523	0.3926	30.0528	29.0364	29.6758	0.3736	30.1372	29.1974		0.55	0.8	0.15	0.45
2009	29.0508	0.3687	29.542	28.5772	29.1087	0.3552	29.5527	28.6469		0.2	0.3	0.05	0.15
2010	28.4294	0.3476	28.8578	27.9865	28.4487	0.3235	28.8835	28.0328		0.05	0.2	0.15	0.25
2011	30.4871	0.4237	31.01	29.9228	30.6139	0.4061	31.1217	30.1084		0.55	0.75	0.1	0.4
2012	29.7129	0.4065	30.2291	29.1912	29.7591	0.3848	30.247	29.2672		0.15	0.25	0.1	0.2
Table SI.4.6 Savanna WST LST, per year summary Listed are mean, std, 90th quantile and 10th quantile for deep and shallow WTD. Percentage of significant results from randomisation is given
Savanna LST	Deep				Shallow					Percentage significant (greater than 66%, year is considered significant)
WST	Mean	STD	90	10	Mean	STD	90	10		Wlcoxon Rank	Kolomogorov Smirnov	90th quantile	10th quantile
2001	32.5706	0.547	33.2556	31.8649	32.7432	0.5499	33.4706	32.0643		0.45	0.5	0.1	0.35
2002	33.1712	0.6148	33.9443	32.4111	33.3336	0.6136	34.1143	32.5871		0.4	0.2	0.1	0.15
2003	33.1544	0.5483	33.8387	32.4868	33.232	0.5319	33.917	32.572		0.3	0.55	0.45	0.25
2004	33.5383	0.5687	34.2733	32.8187	33.6019	0.5434	34.2872	32.9286		0.1	0.5	0.25	0.2
2005	33.8472	0.5648	34.5735	33.1342	33.9165	0.5631	34.645	33.2241		0.05	0.1	0.05	0.3
2006	33.1467	0.5149	33.8005	32.5277	33.2037	0.507	33.8446	32.5621		0.1	0.2	0.1	0
2007	33.783	0.5883	34.5416	33.0449	33.8815	0.5919	34.6297	33.1217		0.1	0.1	0.05	0.05
2008	32.1546	0.6259	32.9784	31.3995	32.3229	0.6288	33.0885	31.5206		0.25	0.2	1	1
2009	32.7547	0.5558	33.4818	32.0499	32.8635	0.5205	33.5304	32.2233		0.25	0.15	0.6	0.65
2010	33.5533	0.595	34.3335	32.8269	33.5258	0.6008	34.2937	32.7557		0.1	0.05	0.9	0.9
2011	32.8716	0.5645	33.5652	32.1691	32.8966	0.5686	33.6531	32.1857		0.05	0.15	0.4	0.1
Table SI.4.7 Crop mean daily LST, per year summary Listed are mean, std, 90th quantile and 10th quantile for deep and shallow WTD. Percentage of significant results from randomisation is given
Crop LST	Deep				Shallow					Percentage significant (greater than 66%, year is considered significant)
Daily	Mean	std	90th	10th	Mean	std	90th	10th		Wlcoxon Rank	Kolomogorov Smirnov	90th quantile	10th quantile
2001	34.0353	0.2926	34.3962	33.6519	34.0422	0.274	34.3828	33.6936		0	0.05	0.25	0.5
2002	34.7128	0.3358	35.1118	34.28	34.6643	0.2978	35.0337	34.2834		0.15	0.55	0.75	0.55
2003	33.9649	0.2978	34.3491	33.5856	33.8036	0.2699	34.1483	33.451		0.9	0.95	0.8	0.15
2004	33.8558	0.3037	34.2357	33.4631	33.7574	0.2837	34.1119	33.3867		0.5	0.65	0.5	0.15
2005	34.2237	0.2861	34.5906	33.8532	34.0882	0.2759	34.4381	33.7466		0.95	0.9	0.75	0.05
2006	33.3767	0.2496	33.6994	33.0557	33.405	0.2506	33.7162	33.0813		0.05	0.1	0	0.2
2007	34.2196	0.2973	34.6004	33.8502	34.1398	0.2689	34.4848	33.7789		0.45	0.75	0.9	0.4
2008	34.257	0.281	34.611	33.9122	34.0696	0.2806	34.4296	33.7035		0.95	0.95	0.75	0.1
2009	33.1729	0.2693	33.5186	32.8316	33.1541	0.2534	33.4801	32.8158		0.1	0.2	0.4	0.05
2010	34.8068	0.2857	35.179	34.4326	34.7275	0.2747	35.0619	34.3662		0.5	0.55	0.1	0.1
2011	34.4014	0.2917	34.7637	34.0259	34.1349	0.2885	34.5035	33.7589		1	1	0.8	0.1
2012	33.8068	0.2592	34.1324	33.4806	33.8371	0.2328	34.1325	33.537
Table SI.4.8 Crop DST LST, per year summary Listed are mean, std, 90th quantile and 10th quantile for deep and shallow WTD. Percentage of significant results from randomisation is given
LST Crop	Deep				Shallow					Percentage significant (greater than 66%, year is considered significant)
DST	Mean	STD	90	10	Mean	STD	90	10		Wlcoxon Rank	Kolomogorov Smirnov	90th quantile	10th quantile
2002	32.3259	0.4335	32.8769	31.7736	32.0467	0.4373	32.6125	31.4955		0.95	0.95	0.6	0.15
2003	33.0359	0.4444	33.62	32.4495	32.7268	0.4506	33.3077	32.1494		0.95	0.95	0.7	0.3
2004	31.7684	0.4458	32.3558	31.1935	31.3104	0.4306	31.863	30.7669		1	1	1	0.95
2005	30.5653	0.3981	31.0692	30.0666	30.342	0.4046	30.869	29.833		0.75	0.65	0.3	0.65
2006	32.1453	0.4333	32.7151	31.576	31.5918	0.448	32.1738	31.002		1	1	0.75	0.95
2007	30.2174	0.3592	30.671	29.7413	29.9066	0.4097	30.4453	29.3869		0.95	0.95	0.4	0.85
2008	31.3177	0.4001	31.8435	30.7987	30.8795	0.4345	31.4325	30.3114		1	1	0.7	0.95
2009	29.93	0.406	30.4719	29.4249	29.4998	0.4559	30.1108	28.9306		1	1	0.1	1
2010	29.6498	0.3902	30.1443	29.1351	29.1861	0.4008	29.6956	28.6694		1	1	0.95	0.95
2011	31.9518	0.4119	32.4911	31.4148	31.6769	0.4551	32.2852	31.0877		0.85	0.8	0.15	0.95
2012	30.9112	0.4137	31.4427	30.3571	30.3335	0.471	30.9336	29.7358		1	1	0.65	1
Table SI.4.9 Crop WST LST, per year summary Listed are mean, std, 90th quantile and 10th quantile for deep and shallow WTD. Percentage of significant results from randomisation is given
LST Crop	Deep				Shallow					Percentage significant (greater than 66%, year is considered significant)
WST	Mean	STD	90	10	Mean	STD	90	10		Wlcoxon Rank	Kolomogorov Smirnov	90th quantile	10th quantile
2001	35.8872	0.5207	36.5453	35.2422	35.7338	0.483	36.3614	35.0927		0.5	0.55	0.5	0.15
2002	36.6641	0.5975	37.424	35.901	36.6088	0.6483	37.4322	35.7854		0.1	0.25	0.05	0.15
2003	35.7773	0.5064	36.4455	35.1337	35.6697	0.5353	36.3663	34.9762		0.25	0.4	0.05	0.2
2004	36.1544	0.5021	36.8165	35.4976	35.9212	0.4998	36.5779	35.2766		0.8	0.95	0.75	0.1
2005	36.8679	0.5136	37.507	36.1957	36.7301	0.5166	37.366	36.0376		0.2	0.15	0.05	0.05
2006	36.064	0.5454	36.7564	35.3588	36.1111	0.5619	36.8161	35.3807		0.05	0.05	0	0.1
2007	37.1481	0.5348	37.8453	36.4263	37.4515	0.5074	38.1033	36.7912		0.85	0.9	0.2	0.75
2008	33.5759	0.7179	34.5086	32.67	33.2567	0.7866	34.2699	32.2514		0.5	0.45	1	1
2009	36.0152	0.5397	36.69	35.3115	35.9981	0.5612	36.6759	35.2953		0	0	0.05	0.05
2010	36.7226	0.5647	37.4264	36.029	36.3068	0.5646	37.0177	35.5761		0.95	0.85	0.85	0.7
2011	35.3792	0.4951	35.9858	34.74	35.0503	0.4901	35.7093	34.4527		0.8	0.8	0.85	0.5

## Sheet: 6. EVI Annual
Table SI.6.1 Forest mean daily EVI, per year summary Listed are mean, std, 90th quantile and 10th quantile for deep and shallow WTD. Percentage of significant results from randomisation is given															* Colours represent significant differences
Forest EVI	Deep				Shallow					Percentage significant (greater than 66%, year is considered significant)					Green - WR, KS
Daily	Mean	std	90th	10th	Mean	std	90th	10th		Wlcoxon Rank	Kolomogorov Smirnov	90th quantile	10th quantile		Blue - KS
2001	0.4951	0.0079	0.5051	0.485	0.4956	0.0086	0.506	0.4845		0.1	0.05	0	0.05		Red - 90th quantile
2002	0.5119	0.0091	0.5229	0.5002	0.5122	0.0098	0.5241	0.4992		0	0.1	0.05	0.1		Yellow - 10th quantile
2003	0.4953	0.0105	0.5079	0.4816	0.4966	0.0108	0.5094	0.4826		0.05	0	0.05	0.05
2004	0.4834	0.0119	0.4981	0.4673	0.4853	0.0116	0.5002	0.4698		0.1	0.1	0.05	0
2005	0.4831	0.0123	0.498	0.4667	0.4852	0.0114	0.4994	0.4697		0.05	0.05	0.1	0.15
2006	0.4879	0.0111	0.5012	0.4737	0.4904	0.0109	0.5037	0.4755		0.15	0.15	0.15	0.1
2007	0.4896	0.0116	0.5044	0.4744	0.4923	0.0113	0.5061	0.477		0.2	0.2	0.05	0.05
2008	0.4731	0.011	0.4866	0.4592	0.4757	0.0107	0.4883	0.4611		0.25	0.3	0	0.1
2009	0.495	0.0107	0.5085	0.4808	0.4973	0.0108	0.5106	0.4832		0.2	0.2	0.05	0
2010	0.4905	0.0116	0.5051	0.4762	0.4927	0.0116	0.5073	0.4776		0.05	0.05	0	0.15
2011	0.479	0.0116	0.4934	0.4638	0.482	0.0115	0.4971	0.467		0.25	0.15	0.1	0.15
2012	0.4867	0.0109	0.5007	0.4727	0.4889	0.0108	0.5021	0.4747
Table SI.6.2 Forest DST EVI, per year summary Listed are mean, std, 90th quantile and 10th quantile for deep and shallow WTD. Percentage of significant results from randomisation is given
Forest EVI	Deep				Shallow					Percentage significant (greater than 66%, year is considered significant)
DST	Mean	std	90th	10th	Mean	std	90th	10th		Wlcoxon Rank	Kolomogorov Smirnov	90th quantile	10th quantile
2002	0.4985	0.009	0.5097	0.487	0.4985	0.01	0.5112	0.4857		0.05	0.15	0.1	0.1
2003	0.5034	0.0096	0.5151	0.4906	0.5034	0.0107	0.5174	0.4893		0.05	0.2	0.05	0.2
2004	0.4954	0.0106	0.5081	0.4816	0.4941	0.0113	0.5082	0.4798		0.05	0.05	0.05	0.15
2005	0.4925	0.0129	0.5083	0.4746	0.4942	0.0129	0.5095	0.4777		0	0	0	0.05
2006	0.4867	0.0144	0.5033	0.4679	0.4879	0.0131	0.5033	0.4714		0	0	0	0.05
2007	0.4593	0.0123	0.4741	0.4433	0.4595	0.0119	0.4743	0.4444		0	0.05	0	0
2008	0.4948	0.0121	0.5099	0.4789	0.4955	0.0116	0.5103	0.4806		0.05	0.05	0	0
2009	0.4767	0.0124	0.4918	0.4604	0.4788	0.0122	0.4941	0.4625		0.2	0.15	0	0.05
2010	0.4813	0.0116	0.4959	0.4661	0.4812	0.0118	0.4959	0.4661		0.1	0.2	0.1	0
2011	0.4987	0.0122	0.5134	0.4819	0.4995	0.0127	0.5149	0.4826		0	0	0	0.05
2012	0.4767	0.0127	0.4928	0.4596	0.4782	0.0128	0.494	0.4612		0.1	0.05	0.05	0.05
Table SI.6.3 Forest WST EVI, per year summary Listed are mean, std, 90th quantile and 10th quantile for deep and shallow WTD. Percentage of significant results from randomisation is given
Forest EVI	Deep				Shallow					Percentage significant (greater than 66%, year is considered significant)
WST	Mean	std	90th	10th	Mean	std	90th	10th		Wlcoxon Rank	Kolomogorov Smirnov	90th quantile	10th quantile
2001	0.4802	0.014	0.498	0.4623	0.4825	0.0142	0.5003	0.4636		0.15	0.15	0.05	0.15
2002	0.5215	0.0173	0.5439	0.4992	0.5219	0.0178	0.5443	0.499		0	0	0	0.05
2003	0.5182	0.0169	0.5389	0.4956	0.5228	0.0171	0.5442	0.5005		0.25	0.35	0.15	0.2
2004	0.512	0.0167	0.5326	0.4894	0.5143	0.016	0.5344	0.4929		0.05	0.1	0	0.05
2005	0.4756	0.0185	0.499	0.451	0.4808	0.0184	0.5049	0.4568		0.2	0.15	0.1	0.2
2006	0.5206	0.017	0.5426	0.4987	0.5258	0.017	0.5474	0.5042		0.25	0.3	0.15	0.15
2007	0.4985	0.0183	0.5213	0.4742	0.506	0.0186	0.5291	0.4815		0.45	0.3	0.2	0.2
2008	0.4529	0.0231	0.4818	0.4227	0.4588	0.0231	0.4873	0.4296		0.2	0.2	0.15	0.25
2009	0.5067	0.0173	0.528	0.484	0.5123	0.0178	0.5346	0.4885		0.4	0.3	0	0.15
2010	0.5021	0.0187	0.5259	0.4775	0.5058	0.0178	0.529	0.4818		0.05	0.05	0.05	0.5
2011	0.5204	0.0178	0.5431	0.4972	0.527	0.0169	0.5489	0.5049		0.4	0.4	0	0.4
Table SI.6.4 Savanna mean daily EVI, per year summary Listed are mean, std, 90th quantile and 10th quantile for deep and shallow WTD. Percentage of significant results from randomisation is given
Savanna EVI	Deep				Shallow					Percentage significant (greater than 66%, year is considered significant)
Daily	Mean	std	90th	10th	Mean	std	90th	10th		Wlcoxon Rank	Kolomogorov Smirnov	90th quantile	10th quantile
2001	0.4078	0.0142	0.4262	0.3894	0.4069	0.0145	0.4252	0.3874		0.05	0.05	0.05	0.15
2002	0.4041	0.0155	0.4242	0.3842	0.4019	0.0153	0.421	0.3825		0.05	0	0.1	0.05
2003	0.3997	0.0151	0.4181	0.3792	0.4002	0.0147	0.4193	0.3807		0.1	0	0	0.1
2004	0.3928	0.015	0.4121	0.3726	0.3934	0.0144	0.4115	0.3746		0.05	0.15	0.05	0.05
2005	0.3909	0.0134	0.4077	0.3738	0.3913	0.0131	0.4081	0.3741		0.05	0.15	0	0.05
2006	0.4087	0.0126	0.4241	0.3919	0.4085	0.0128	0.4247	0.392		0.05	0.1	0.05	0.15
2007	0.3982	0.0132	0.4151	0.3801	0.3978	0.0136	0.4157	0.38		0.05	0	0.1	0.05
2008	0.395	0.0121	0.41	0.3797	0.396	0.0121	0.4116	0.3802		0.1	0.1	0.2	0.1
2009	0.4192	0.0123	0.4344	0.4026	0.4205	0.013	0.4371	0.4031		0.2	0.2	0.15	0.1
2010	0.3913	0.0128	0.4078	0.3747	0.3932	0.0132	0.4097	0.3756		0.1	0.15	0.1	0
2011	0.3943	0.012	0.4093	0.3785	0.3956	0.0122	0.4111	0.3798		0.1	0.1	0.05	0.05
2012	0.4084	0.0126	0.4238	0.3921	0.4094	0.0127	0.4255	0.3924
Table SI.6.5 Savanna DST EVI, per year summary Listed are mean, std, 90th quantile and 10th quantile for deep and shallow WTD. Percentage of significant results from randomisation is given
Savanna EVI	Deep				Shallow					Percentage significant (greater than 66%, year is considered significant)
DST	Mean	std	90th	10th	Mean	std	90th	10th		Wlcoxon Rank	Kolomogorov Smirnov	90th quantile	10th quantile
2002	0.4314	0.0186	0.4551	0.4075	0.4288	0.0189	0.4534	0.4042		0.2	0.15	0.05	0.2
2003	0.4112	0.0191	0.4348	0.3857	0.407	0.0186	0.4309	0.3832		0.05	0.2	0	0.15
2004	0.4189	0.0205	0.4435	0.3926	0.4169	0.0197	0.4425	0.3919		0.05	0.15	0	0.1
2005	0.4253	0.0211	0.4513	0.3975	0.4248	0.0198	0.4498	0.3984		0.05	0.1	0	0.05
2006	0.4023	0.0202	0.4278	0.3767	0.4025	0.0196	0.4271	0.3766		0.1	0	0.05	0.05
2007	0.4155	0.0173	0.4376	0.3929	0.4154	0.0179	0.4375	0.3915		0.05	0.05	0.05	0.05
2008	0.4229	0.0179	0.4455	0.3999	0.4222	0.0173	0.4443	0.3991		0.05	0	0.05	0
2009	0.4196	0.0174	0.4424	0.3967	0.4201	0.0174	0.4421	0.3984		0.05	0.05	0.05	0.05
2010	0.4438	0.0172	0.4653	0.4212	0.447	0.018	0.4712	0.4233		0.15	0.3	0.4	0.1
2011	0.401	0.016	0.421	0.3798	0.4009	0.0168	0.4224	0.3793		0	0	0	0.05
2012	0.4002	0.0172	0.4219	0.3773	0.4008	0.0173	0.4227	0.3782		0	0.05	0.05	0
Table SI.6.6 Savanna WST EVI, per year summary Listed are mean, std, 90th quantile and 10th quantile for deep and shallow WTD. Percentage of significant results from randomisation is given
Savanna EVI	Deep				Shallow					Percentage significant (greater than 66%, year is considered significant)
WST	Mean	std	90th	10th	Mean	std	90th	10th		Wlcoxon Rank	Kolomogorov Smirnov	90th quantile	10th quantile
2001	0.3979	0.0186	0.4228	0.3736	0.3991	0.0183	0.4219	0.3757		0	0	0	0.05
2002	0.4251	0.022	0.4535	0.3968	0.4296	0.0212	0.4571	0.4022		0.15	0.15	0.1	0.05
2003	0.4271	0.0202	0.4527	0.4013	0.4322	0.0195	0.4576	0.4065		0.2	0.2	0.1	0.1
2004	0.4234	0.0197	0.449	0.3973	0.4263	0.0188	0.4501	0.4025		0.05	0.1	0	0.1
2005	0.3909	0.0188	0.4151	0.3651	0.3966	0.018	0.4201	0.3731		0.25	0.35	0	0.05
2006	0.4466	0.019	0.4702	0.4216	0.4497	0.0181	0.4726	0.4262		0.05	0.15	0.05	0.15
2007	0.3892	0.0182	0.4118	0.3647	0.3931	0.0183	0.417	0.3701		0.15	0.1	0	0.15
2008	0.4257	0.0245	0.4573	0.3952	0.4326	0.0243	0.4654	0.401		0.2	0.2	0.15	0.05
2009	0.4286	0.0175	0.4511	0.4055	0.4326	0.0185	0.4566	0.4081		0.2	0.25	0.35	0.15
2010	0.4121	0.0204	0.439	0.3853	0.4206	0.019	0.4463	0.3963		0.5	0.35	0.1	0.2
2011	0.4449	0.0193	0.4699	0.4202	0.4489	0.0198	0.4742	0.4233		0.15	0.2	0.05	0
Table SI.6.7 Crop mean daily EVI, per year summary Listed are mean, std, 90th quantile and 10th quantile for deep and shallow WTD. Percentage of significant results from randomisation is given
Crop EVI	Deep				Shallow					Percentage significant (greater than 66%, year is considered significant)
Daily	Mean	std	90th	10th	Mean	std	90th	10th		Wlcoxon Rank	Kolomogorov Smirnov	90th quantile	10th quantile
2001	0.3335	0.0103	0.3468	0.3211	0.337	0.0108	0.3508	0.3231		0.5	0.5	0.1	0.15
2002	0.3227	0.0101	0.3353	0.3099	0.325	0.0106	0.339	0.3114		0.2	0.25	0.2	0.3
2003	0.3448	0.0097	0.3577	0.3321	0.3499	0.0105	0.363	0.3366		0.85	0.9	0.35	0.1
2004	0.3364	0.0096	0.3489	0.3242	0.3417	0.0103	0.3548	0.3285		0.8	0.55	0.45	0.1
2005	0.3423	0.0091	0.3536	0.3306	0.3481	0.0103	0.3613	0.3349		0.9	0.95	0.4	0.25
2006	0.3676	0.009	0.3789	0.3563	0.3676	0.0102	0.3805	0.3539		0.1	0.1	0.1	0.1
2007	0.3441	0.0089	0.3554	0.3329	0.3481	0.0098	0.3603	0.3356		0.85	0.9	0.1	0.3
2008	0.3616	0.0095	0.374	0.3494	0.3689	0.0107	0.383	0.3549		0.95	0.95	0.85	0.2
2009	0.384	0.0092	0.3959	0.3721	0.387	0.0101	0.3998	0.3738		0.6	0.6	0.6	0.1
2010	0.3465	0.0092	0.3584	0.3348	0.3509	0.0102	0.3641	0.3378		0.8	0.85	0.45	0.15
2011	0.3594	0.0097	0.3724	0.3471	0.367	0.0105	0.38	0.3528		0.95	0.95	0.85	0.2
2012	0.383	0.0096	0.395	0.3714	0.3867	0.0106	0.4007	0.3729
Table SI.6.8 Crop DST EVI, per year summary Listed are mean, std, 90th quantile and 10th quantile for deep and shallow WTD. Percentage of significant results from randomisation is given
Crop EVI	Deep				Shallow					Percentage significant (greater than 66%, year is considered significant)
DST	Mean	std	90th	10th	Mean	std	90th	10th		Wlcoxon Rank	Kolomogorov Smirnov	90th quantile	10th quantile
2002	0.3008	0.0216	0.3299	0.272	0.3126	0.0235	0.3431	0.2823		0.65	0.6	0.2	0.15
2003	0.2934	0.0198	0.3191	0.2679	0.2995	0.0207	0.3258	0.272		0.4	0.35	0.05	0.25
2004	0.3269	0.0211	0.3538	0.3001	0.3366	0.0221	0.3649	0.3082		0.55	0.5	0.15	0.2
2005	0.37	0.0225	0.3992	0.342	0.3787	0.0246	0.4122	0.348		0.15	0.1	0.4	0.05
2006	0.3167	0.0194	0.342	0.2925	0.3283	0.0227	0.3579	0.2997		0.6	0.6	0.4	0.15
2007	0.3763	0.0198	0.4029	0.3521	0.3868	0.0236	0.4176	0.3573		0.3	0.4	0.7	0
2008	0.3676	0.0191	0.3921	0.3431	0.3849	0.023	0.4163	0.356		0.95	0.95	1	0.25
2009	0.3846	0.0209	0.4119	0.3566	0.4029	0.0251	0.4366	0.3711		0.95	0.85	1	0.35
2010	0.409	0.0227	0.4373	0.3796	0.4249	0.0248	0.4568	0.394		0.85	0.8	0.85	0.1
2011	0.3649	0.0204	0.3901	0.3403	0.3763	0.0241	0.4068	0.3473		0.45	0.7	0.75	0.2
2012	0.3639	0.0231	0.394	0.3348	0.3841	0.0271	0.4199	0.3489		0.9	0.8	0.9	0.1
Table SI.6.9 Crop WST EVI, per year summary Listed are mean, std, 90th quantile and 10th quantile for deep and shallow WTD. Percentage of significant results from randomisation is given
Crop EVI	Deep				Shallow					Percentage significant (greater than 66%, year is considered significant)
WST	Mean	std	90th	10th	Mean	std	90th	10th		Wlcoxon Rank	Kolomogorov Smirnov	90th quantile	10th quantile
2001	0.3102	0.0201	0.3355	0.284	0.3186	0.0207	0.3459	0.2915		0.75	0.75	0.35	0.05
2002	0.3264	0.025	0.3581	0.2936	0.3362	0.0276	0.3729	0.3009		0.45	0.4	0.3	0
2003	0.3743	0.0219	0.4017	0.3462	0.3843	0.0239	0.4142	0.3539		0.6	0.7	0.8	0.1
2004	0.3538	0.0214	0.3811	0.3267	0.3664	0.023	0.3955	0.3368		0.8	0.85	0.55	0.1
2005	0.3373	0.0209	0.3632	0.3115	0.3565	0.0225	0.3858	0.3273		0.95	0.95	0.95	0.8
2006	0.3879	0.0212	0.4151	0.3601	0.3964	0.0214	0.4232	0.3678		0.75	0.5	0.25	0.05
2007	0.309	0.0176	0.3318	0.2861	0.3113	0.0179	0.3347	0.2881		0	0.05	0.05	0.15
2008	0.4645	0.0413	0.52	0.4113	0.4969	0.0432	0.5493	0.4421		0.95	0.85	0.8	0.65
2009	0.394	0.0227	0.4241	0.3658	0.4109	0.0248	0.4431	0.3788		0.95	0.95	0.6	0.2
2010	0.3366	0.0218	0.3643	0.3082	0.3549	0.0224	0.3844	0.3256		0.95	0.9	0.7	0.25
2011	0.4056	0.0232	0.4362	0.3754	0.4209	0.0235	0.4498	0.3897		0.8	0.8	0.4	0.5

## Sheet: 5. LST Figures
Figure SI.5.1. Average seasonality of forest LST Red line - Deep WTD, Blue line - Shallow WTD. Errorbars represent standard deviation
Figure SI.5.2. Average seasonality of svanna LST. Red line - Deep WTD, Blue line - Shallow WTD. Errorbars represent standard deviation
Figure SI.5.3. Average annual seasonality of crop LST. Red line - Deep WTD, Blue line - Shallow WTD. Errorbars represent standard deviation
Figure SI.5.4. Annual daily mean of A) Forest B) Savanna C) crop LST. Blue box - Deep WTD, Red box - Shallow WTD.

## Sheet: 7. EVI Figures
Figure SI.7.1. Average seasonality of forest EVI. Red line - Deep WTD, Blue line - Shallow WTD. Errorbars represent standard deviation
Figure SI.7.2. Average seasonality of svanna EVI. Red line - Deep WTD, Blue line - Shallow WTD. Errorbars represent standard deviation
Figure SI.7.3. Average annual seasonality of crop EVI. Red line - Deep WTD, Blue line - Shallow WTD. Errorbars represent standard deviation
Figure SI.7.4. Annual daily mean of A) Forest B) Savanna C) crop EVI. Red box - Deep WTD, Blue box - Shallow WTD.

## Sheet: 9. Topography
Figure SI.9.1 SRTM elevation data of study area. Reprojected and rescaled to match MODIS sinusoidal projection at 1km resolution
Figure SI.9.2 Boxplot of distriubution of Topographic wetness index of selected Forest pixels. No significant differences were found between deep and shallow TWI
Figure SI.9.3 Boxplot of distriubution of Topographic wetness index of selected Savanna pixels. No significant differences were found between deep and shallow TWI
Figure SI.9.4 Boxplot of distriubution of Topographic wetness index of selected Crop pixels. No significant differences were found between deep and shallow TWI

## Sheet: 8. WTD
Figure SI.8.1 Water table depth map data from Fan & Miguez Macho (2012) reprojected and rescaled to match MODIS sinusoidal projection at 1km resolution
Figure SI.8.2 Histogram of Water table depth of study area. Mean water table depth 12 m

## Sheet: 10. Cloud Cover
Figure SI.10.1 Seasonality of cloud cover from studied land covers. No significant differences were found between deep and shallow areas of the three land cover classes.
Dark Blue - Forest Deep; Red - Forest Shallow; Yellow - Savanna Deep; Purple - Savanna Shallow; Green - Crop Deep; Light Blue - Crop Shallow
